# Supplementary material for: Machine Learning to Predict Response to Ranibizumab in Neovascular Age-Related Macular Degeneration
Source: PubMed Central journal article supplement — Ophthalmol Sci. 2023 Apr 21;3(4):100319. doi: 10.1016/j.xops.2023.100319 (PMC10251067; doi:10.1016/j.xops.2023.100319), 2023-04-21
Supplement: mmc1.pdf [file mmc1.pdf]

## **Appendix S1. Pixel-Level Annotations and Segmentation Model**

### **Annotations**

Retinal pathology biomarkers and retinal layers were annotated by experts from the Liverpool Ophthalmology Reading Center on the B-scan level and subjected to internal quality assurance processes (a subselection of B-scan annotations of each grader was adjudicated and reviewed by a senior clinician). Specifically, a sparse selection of B-Scans across a total of 143 volume scans (860 B-scans in total), obtained from Cirrus (Carl Zeiss Meditec, Inc., Dublin, CA) OCT machines were annotated by drawing contours of the intraretinal fluid (IRF; cystoid spaces), subretinal fluid (SRF), pigment epithelial detachment (PED), and subretinal hyperreflective material (SHRM; a morphological feature seen on OCT as hyperreflective material located external to the neurosensory retina but internal to the retinal pigment epithelium [RPE]),<sup>1</sup> along with the following 5 retinal layers: internal limiting membrane, interface between outer plexiform layer and Henle's fiber layer, inner and outer boundary of RPE, and Bruch's membrane. Contours were drawn on the B-scans, stored in raster format, and then converted to label maps (fluids) and elevation maps (layers) of the original image dimension.

### **Definition of Training and Holdout Sets**

The annotated B-scans were divided into training and holdout (validation) sets. There were 860 B-scans corresponding to 143 different patients in the training set, and 99 B-scans corresponding to 17 patients in the holdout set. To ensure that each feature was represented with approximately equal ratios in both sets, a fraction of 10% of the annotated B-scans was randomly designated to the holdout set under the stratifications

of SHRM, IRF, SRF, and PED volume. All the B-scans from a given eye were assigned to either the training or the holdout set to avoid overfitting.

### **Details on Training and Tuning**

The U-Net, a convolutional neural network for biomedical image segmentation,<sup>2</sup> was trained using the training set to recognize the 4 retinal pathology-related features using the annotated volumes as training material, i.e., pixel-level semantic segmentation (Fig S3). To reach the best segmentation results on the training data with a 4-fold cross-validation approach, the U-Net was configured as follows. It processed images at 5 different resolution levels, each using 2 convolution layers with  $3 \times 3$  kernels followed by Rectified Linear Unit<sup>3,4</sup> activations. The number of kernels in each layer was  $64 \times 2^l$ , where  $l$  is the resolution level from 0 (finest) to 4 (coarsest). Zero padding was applied to the first level to maintain the original input size of  $512 \times 512$  pixels. The model was trained with the Adam optimizer<sup>5</sup> with a learning rate of 0.001 using batches of 12 images for 60 epochs. Dropout<sup>6</sup> was applied during training with 0.5 probability before and after the convolutions of the coarsest resolution level, and deconvolution (or transposed convolution) for the upsampling/decoder branch.

### **Performance**

Segmentation performance for SHRM, IRF, SRF, and PED on the holdout set was assessed against the corresponding reference annotations and measured via performance metrics (Dice coefficient [Sørensen-Dice similarity coefficients]). Compared with human annotation, our model yielded a mean Dice coefficient ( $\pm$

standard deviation) of 0.69 ( $\pm$  0.26) for SHRM, 0.70 ( $\pm$  0.26) for IRF, 0.67 ( $\pm$  0.27) for SRF, and 0.73 ( $\pm$  0.24) for PED. Median values were significantly higher, with 0.76, 0.78, 0.74, and 0.82, respectively, indicating distributions with tails to the left.

## References

1. Willoughby AS, Ying GS, Toth CA, et al; Comparison of Age-Related Macular Degeneration Treatments Trials Research Group. Subretinal hyperreflective material in the Comparison of Age-Related Macular Degeneration Treatments Trials. *Ophthalmology*. 2015;122(9):1846–1853.e5.
2. Ronneberger O, Fischer F, Brox T. U-Net: convolutional networks for biomedical image segmentation. In: Navab N, Hornegger J, Wells W, Frangi A, eds. *Medical Image Computing and Computer-Assisted Intervention - MICCAI 2015 Lecture Notes in Computer Science*. Cham, Switzerland: Springer; 2015:234–241.
3. Krizhevsky A, Sutskever I, Hinton GE. ImageNet classification with deep convolutional neural networks. Presented at: 26th Annual Conference on Neural Information Processing Systems; December 3–6, 2012; Lake Tahoe, NV.
4. Nair V, Hinton GE. Rectified linear units improve restricted Boltzmann machines. Presented at: 27th International Conference on Machine Learning; June 21–24, 2010; Haifa, Israel.
5. Kingma DP, Ba J. Adam: a method for stochastic optimization. Presented at: 3rd International Conference on Learning Representations; May 7–9, 2015; San Diego, CA.

6. Srivastava N, Hinton G, Krizhevsky A, et al. Dropout: a simple way to prevent neural networks from overfitting. *J Mach Learn Res.* 2014;15:1929–1958.
